# Supplementary material for: Reversal of cisplatin chemotherapy resistance by glutathione-resistant copper-based nanomedicineviacuproptosis
Source: Royal Society of Chemistry journal article supplement (doi:10.1039/d2tb01150f), 2022-01-01
Supplement: d2tb01150f1.pdf [file d2tb01150f1.pdf]

Supporting Information

## **Reversal of cisplatin chemotherapy resistance by glutathione-resistant copper-based nanomedicine via cuproptosis**

Yao Lu,<sup>a</sup> Qingqing Pan,<sup>b</sup> Wenxia Gao,<sup>c</sup> Yuji Pu,<sup>a\*</sup> Bin He<sup>a\*</sup>

<sup>a</sup> National Engineering Research Center for Biomaterials, College of Biomedical Engineering, Sichuan University, Chengdu 610064, China

<sup>b</sup> School of Preclinical Medicine, Chengdu University, Chengdu 610106, China

<sup>c</sup> College of Chemistry & Materials Engineering, Wenzhou University, Wenzhou 325027, China

**Materials.** Copper chloride dihydrate ( $\text{CuCl}_2 \cdot 2\text{H}_2\text{O}$ ), dimethyl sulfoxide (DMSO), and sodium hydroxide (NaOH) were purchased from Kelong Chemical Reagent Factory (Chengdu, China). *Cis*-Diaminodichloroplatinum (CDDP) was purchased from Shanghai yuanye Bio-Technology Co., Ltd (China). Fluorescein isothiocyanate isomer I (FITC) was purchased from Tokyo Chemical Industry (Japan). RPMI 1640 medium, EMEM medium, trypsin, fetal bovine serum (FBS) and penicillin-streptomycin solution were obtained from GIBCO®. GSH and GSSG assay kit and Annexin V-FITC apoptosis detection kit were supplied by Beyotime Biotechnology Co., Ltd (Shanghai, China), and FractionPREP™ cell fractionation kit was obtained from AMSBIO LLC (California, USA). NPLOC4 (Cat# DF13194, RRID: AB\_2846154), Phospho-Histone H2A.X (Ser139, Cat# AF3187, RRID: AB\_2834619), FDX1 antibody (Cat# DF7950, RRID: AB\_2841351),  $\beta$ -actin (Cat# AF7018, RRID: AB\_2839420) and COX IV (Cat# AF5468, RRID: AB\_2837951) antibodies were purchased from Affinity Biosciences Ltd (Jiangsu, China). RIPA lysis buffer and BCA protein quantification kit were obtained from Beijing Biosharp®. Mitochondrial protein extraction kit was provided by Beijing Solarbio®.

**Cell culture.** Human non-small cell lung cancer A549 and CDDP resistant A549/DDP cells were incubated in RPMI 1640 medium containing 10% FBS and 1% penicillin/streptomycin. A549/DDP cells were obtained by gradient incubation of A549 cells with 500-1000 ng/mL of CDDP in complete medium.<sup>1,2</sup> Similarly, human cervical cancer (HeLa), mouse embryonic fibroblast (NIH/3T3), and mouse fibroblast (L-929) cell lines were cultured in DMEM complete medium. All the above cells were cultivated in a humidified incubator with 5%  $\text{CO}_2$  at 37 °C, and grown to about 80% confluence before splitting or harvesting.

**Cell morphology observations.** To examine the morphology of dying cells, A549 and A549/DDP

cells were seeded in the 6-well plates at about 50% confluency. The cells were then treated with CDDP (10  $\mu$ M for A549 cells; 30  $\mu$ M for A549/DDP cells), CuET (500 nM), or CuET NPs (917 nM) for 24 h.

Phase-contrast cell images were captured on an Olympus IX71 microscope.

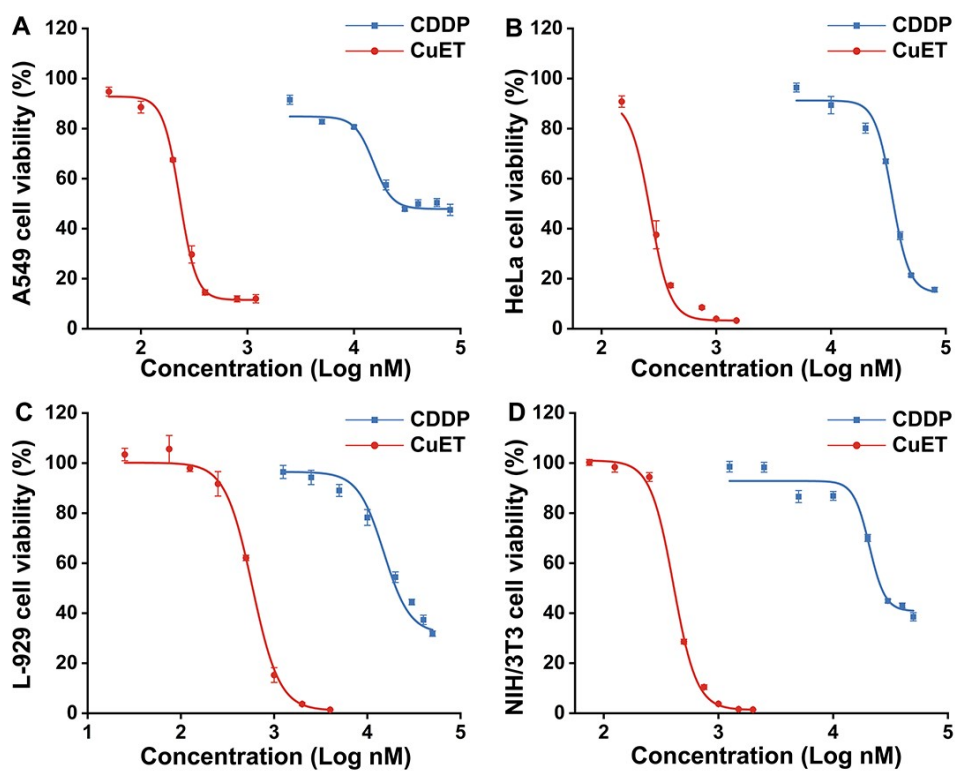

**Fig. S1** Cytotoxicity results of CDDP and CuET against cancer (A, B) and normal (C, D) cells.

**Table S1** Half-inhibitory concentrations of CDDP and CuET against different cell lines.

| IC <sub>50</sub> | A549  | A549/DDP | HeLa  | L-929 | NIH/3T3 |
|------------------|-------|----------|-------|-------|---------|
| CDDP ( $\mu$ M)  | 15.2  | 49.0     | 34.1  | 15.1  | 30.7    |
| CuET (nM)        | 230.8 | 358.6    | 265.1 | 584.0 | 405.8   |

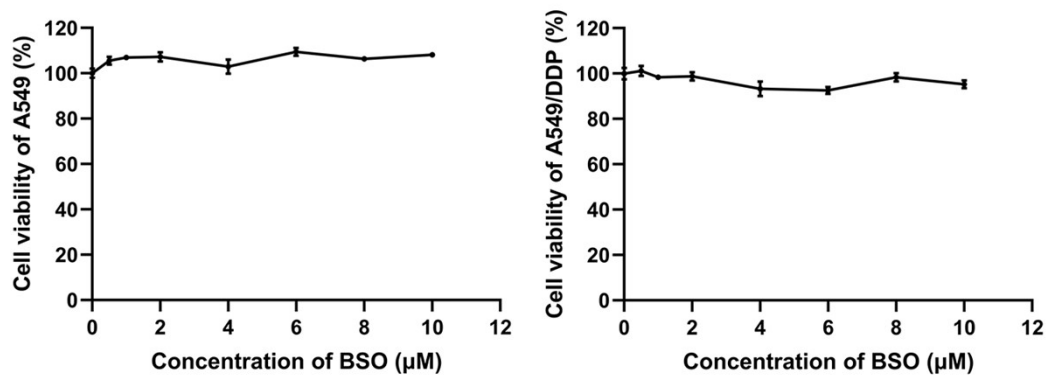

Fig. S2 Viability of A549 and A549/DDP cells treated with different concentrations of BSO.

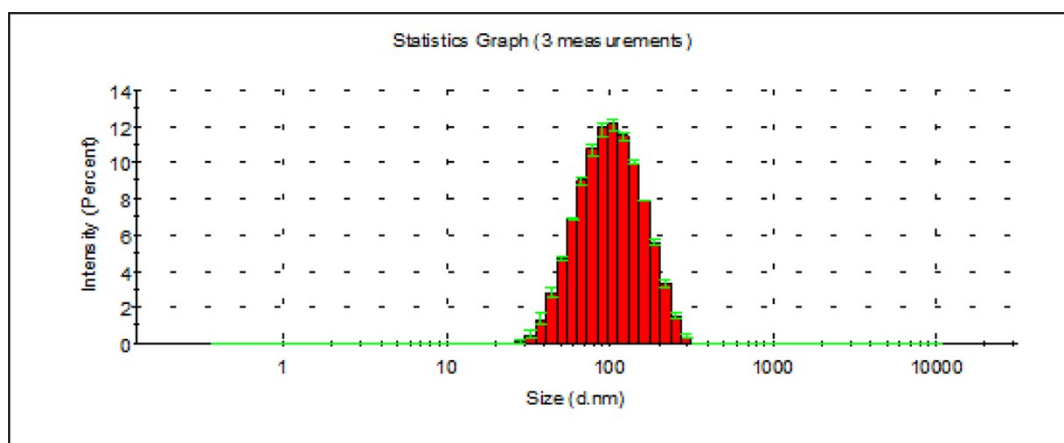

Fig. S3 Hydrodynamic diameter of CuET NPs measured by dynamic light scattering.

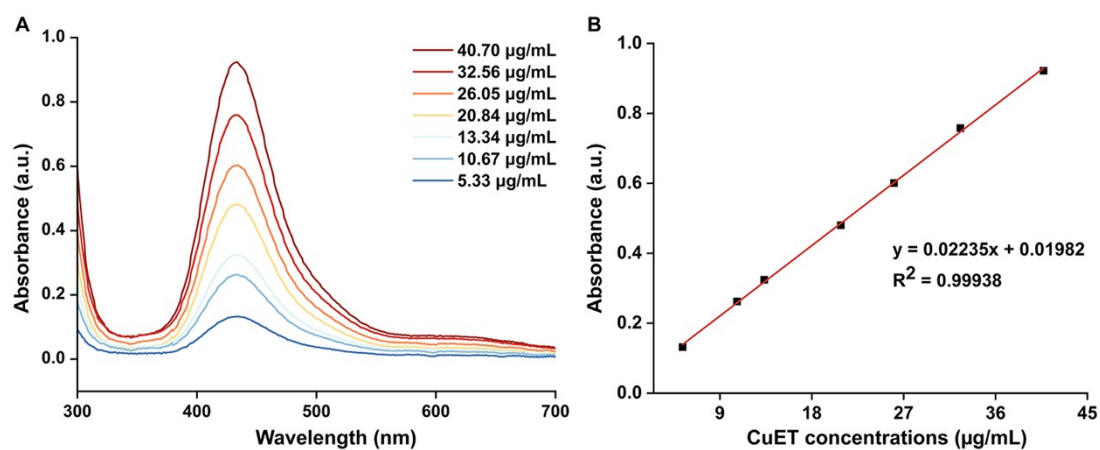

Fig. S4 UV-vis absorption spectra (A) and fitted standard curve (B) of CuET.

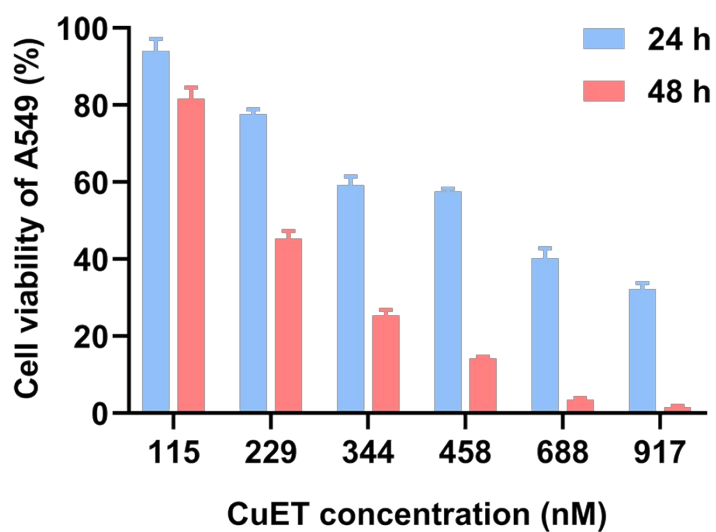

**Fig. S5** Viability of A549 cells treated with CuET NPs for different incubation times.

**Table S2** Half-inhibitory concentrations of CuET NPs with different incubation times.

| IC <sub>50</sub> (nM) | A549  | A549/DDP |
|-----------------------|-------|----------|
| 24 h                  | 526.6 | 524.4    |
| 48 h                  | 213.8 | 273.1    |

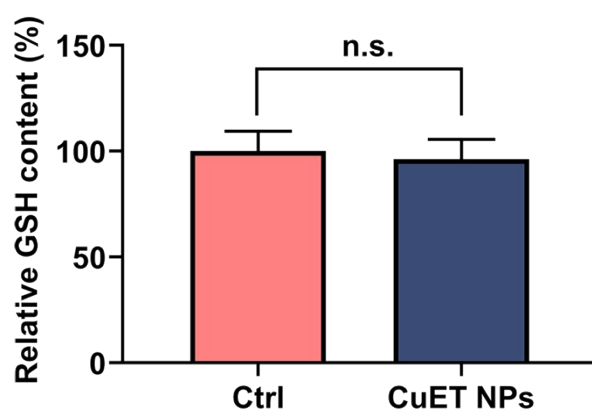

**Fig. S6** Relative GSH content in A549/DDP cells treated with CuET NPs. n.s.  $P > 0.05$ .

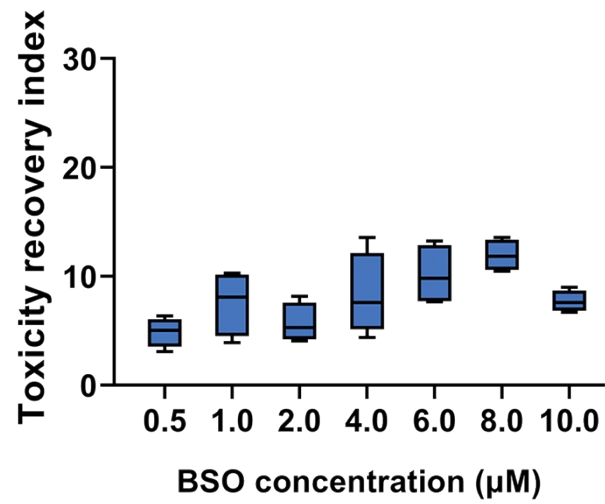

**Fig. S7** Toxicity recovery index of CuET NPs under different concentrations of BSO treatment in A549/DDP cells.

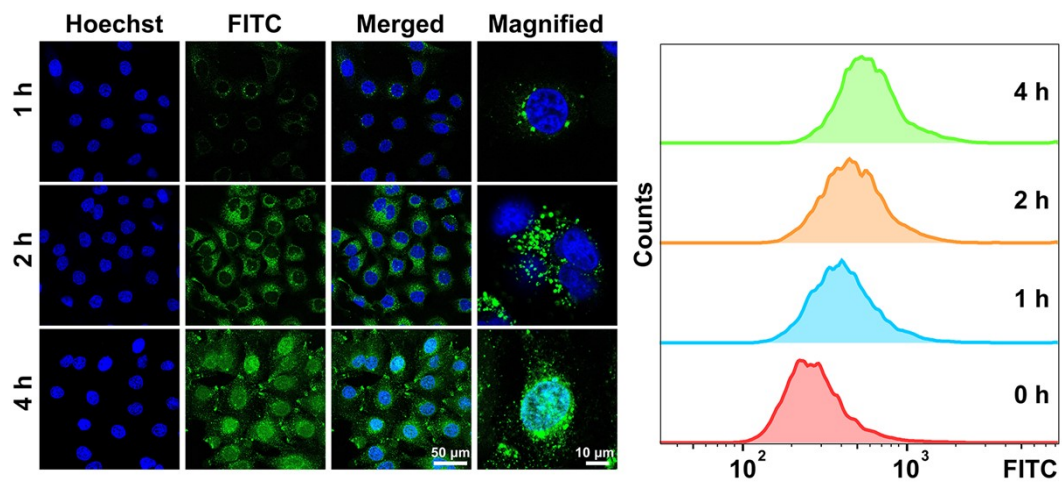

**Fig. S8** CLSM and flow cytometry analysis of cellular endocytosis of FITC-labeled CuET NPs by A549 cells at varying treatment durations.

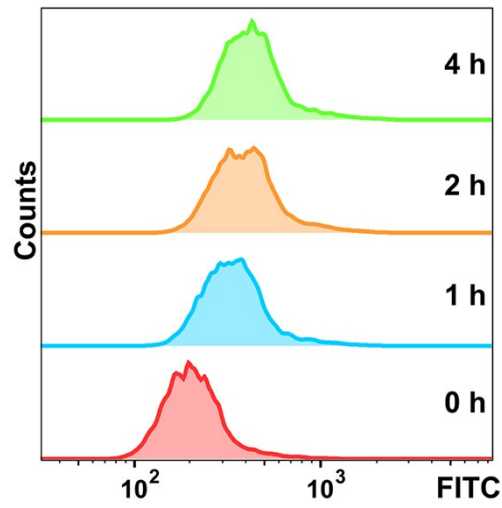

**Fig. S9** Flow cytometry analysis of cellular endocytosis of FITC-labeled CuET NPs by A549/DDP cells at varying treatment durations.

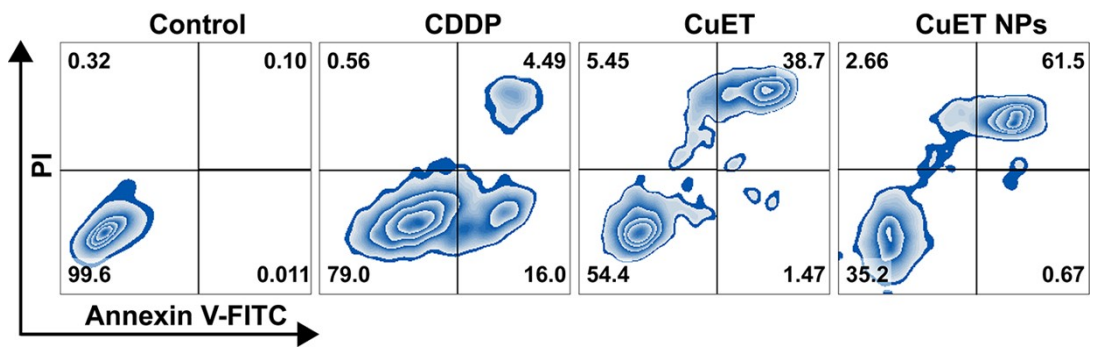

**Fig. S10** Flow cytometry results of annexin V-FITC/propidium iodide double-stained A549 cells.

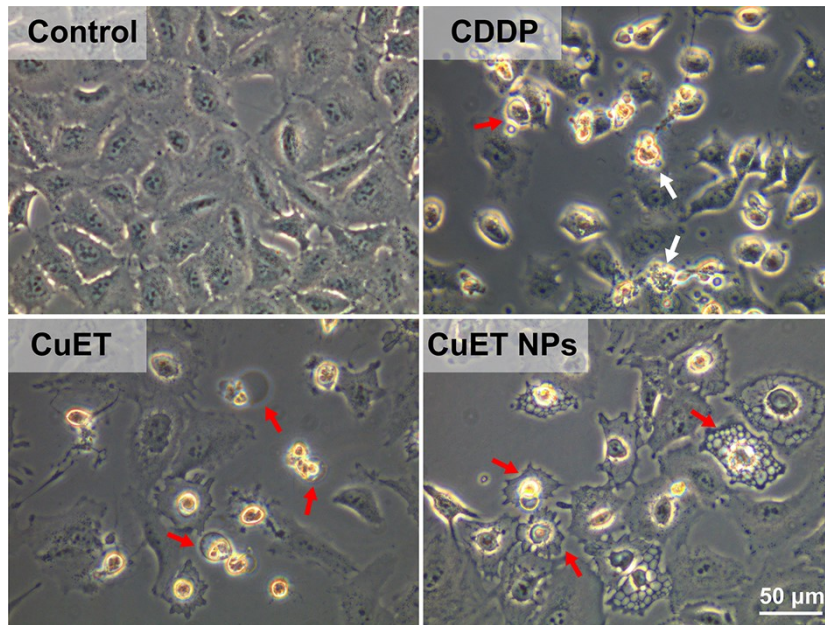

**Fig. S11** A549 cell observations by a microscope after different treatments for 6 h. White arrows indicate apoptotic cells with apoptotic bodies, and red arrows indicate cytolysis death.

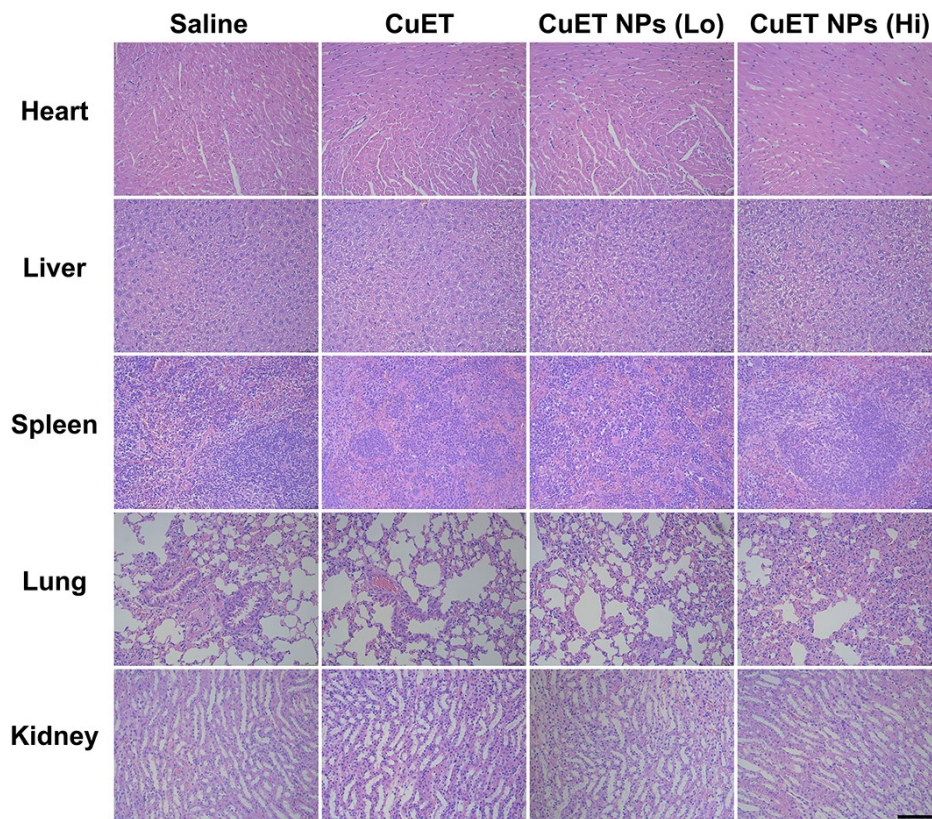

**Fig. S12** H&E staining images of main organs in different groups on day 16. Scale bar: 100  $\mu$ m.



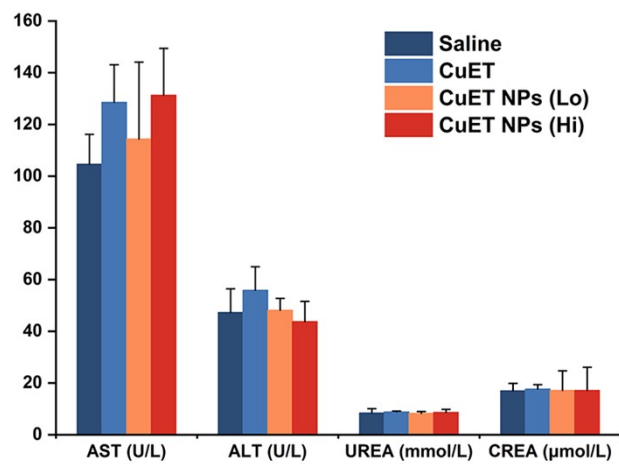

**Fig. S13** Hepatic and renal functions of A549/DDP tumor-bearing mice.

#### References

- 1 M. P. Barr, S. G. Gray, A. C. Hoffmann, R. A. Hilger, J. Thomale, J. D. O'Flaherty, D. A. Fennell, D. Richard, J. J. O'Leary and K. J. O'Byrne, *PLoS One*, 2013, **8**, e54193.
- 2 V. Janson, B. Andersson, P. Behnam-Motlagh, K. G. Engström, R. Henriksson and K. Grankvist, *Cell. Physiol. Biochem.*, 2008, **22**, 45-56.
